# Supplementary material for: Dual defect system of tellurium antisites and silver interstitials in off-stoichiometric Bi2(Te,Se)3+ycausing enhanced thermoelectric performance
Source: Royal Society of Chemistry journal article supplement (doi:10.1039/c8ta05261a), 2018-11-29
Supplement: c8ta05261a1.pdf [file c8ta05261a1.pdf]

1 Electronic Supplementary Information (ESI)

2 Dual Defect System of Tellurium Antisites and Silver  
3 Interstitials in Off-Stoichiometric  $\text{Bi}_2(\text{Te,Se})_{3+y}$  Causing  
4 Enhanced Thermoelectric Performance

5

6 Cham Kim,<sup>\*a</sup> David Humberto Lopez,<sup>b</sup> Dong Hwan Kim<sup>a</sup> and Hoyoung Kim<sup>a</sup>

7 <sup>a</sup>Daegu Gyeongbuk Institute of Science and Technology (DGIST), 333 Techno Jungang-daero, Daegu,  
8 42988, Republic of Korea

9 <sup>b</sup>Department of Chemical and Environmental Engineering, University of Arizona, 1133 E. James. E.  
10 Rogers Way, Tucson, AZ, 85721, USA

11

12

13

14

15

16

1 ESI 1. Theoretical simulation/calculation of Ag amount in  $\text{Bi}_2\text{Te}_{2.90}\text{Se}_{0.15}$

2 As explained in the Experimental details (2.2. Sample preparation), the amount of Ag in  $\text{Bi}_2\text{Te}_{2.90}\text{Se}_{0.15}$   
3 was adjusted by using different amount of  $\text{AgNO}_3$ . 15g of  $\text{Bi}_2\text{Te}_{2.90}\text{Se}_{0.15}$  was mixed with 250 ml of 4 mM  
4  $\text{NaBH}_4$  (aq) and different amount of  $\text{AgNO}_3$  was added to the mixed solution.

5 For instance, to prepare the  $\text{Bi}_2\text{Te}_{2.90}\text{Se}_{0.15}$  with 0.3 wt% Ag, 0.045 g of Ag (=0.417 mmol Ag) is  
6 required; thus, 0.417 mmol of  $\text{AgNO}_3$  should be used as shown in Eq. A.

7

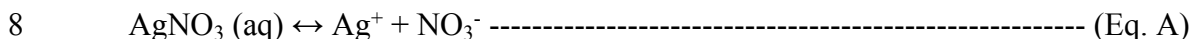

9

10 From the initially prepared 2 mM  $\text{AgNO}_3$  aqueous solution, we collected approximately 208.5 ml (i.e.,  
11 0.417 mmol  $\text{AgNO}_3$ ) and added it to the mixed solution of  $\text{Bi}_2\text{Te}_{2.90}\text{Se}_{0.15}$  and  $\text{NaBH}_4$ . Theoretically, 1  
12 mol  $\text{AgNO}_3$  should be reduced by 1 mol  $\text{NaBH}_4$ , thus affording 1 mol Ag (Eq. B);

13

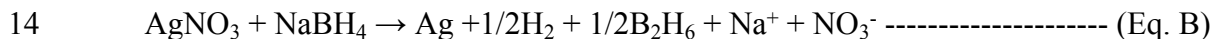

15

16 however, the excess of  $\text{NaBH}_4$  (i.e., 250 ml of 4 mM  $\text{NaBH}_4$  = 1 mmol  $\text{NaBH}_4$ ) was used to guarantee the  
17 complete reduction of 0.417 mmol  $\text{AgNO}_3$  to finally obtain 0.417 mmol Ag (=0.045 g of Ag) deposited  
18 onto 15 g of  $\text{Bi}_2\text{Te}_{2.90}\text{Se}_{0.15}$  (i.e., 0.3 wt% Ag). The atomic composition of the product was measured by  
19 ICP-MS as presented in Table 1. According to the concentration ( $\text{mg L}^{-1}$ ) of the components in the ICP-  
20 MS results, the amount of Ag in the product was 0.29 wt%, which is in proximity to the theoretical  
21 calculation above. For other Ag compositions, we also confirmed that Ag amount of the theoretical  
22 calculation was in accordance with that of the experimental results.

23

24

25

1 ESI 2. Specimen processing for thermoelectric characterizations

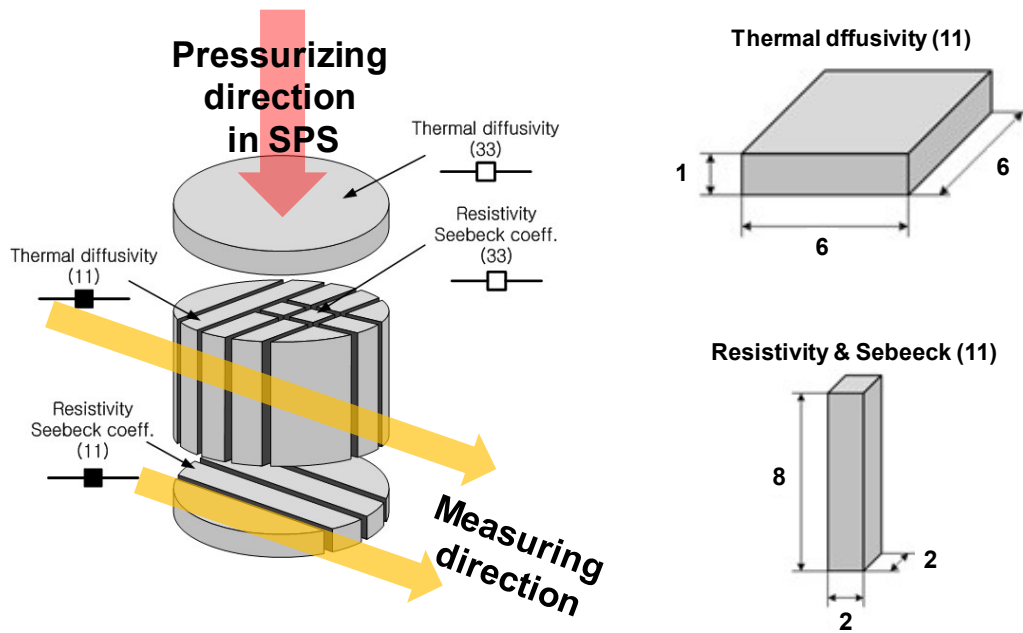

2

3 The product specimen obtained from a spark plasma sintering (SPS) process was cut into the two different  
4 dimensions (i.e., 11, 33) for the measurement of thermal diffusivity and resistivity (or Seebeck  
5 coefficient). 11 and 33 indicate in-plane and out-of-plane direction for the measurement, respectively.  
6 Considering the typical anisotropic nature of  $\text{Bi}_2\text{Te}_3$ -based materials, it is required to observe the  
7 properties along consistent direction; thus, we measured the thermoelectric properties of only those faces  
8 of the specimens that were perpendicular to the pressurizing direction (i.e., we measured the 11  
9 specimens). The standard deviations of the properties were obtained with the processed specimen couples  
10 (with 11 direction) of five different raw specimens per each material. The standard deviations were shown  
11 as error bars (Figure 1, 6, and 7).
